1  
2  
3  
4  
5  
6  
7  
8  
9  
10  
11  
12  
13  
14  
15  
16  
17  
18

**Induced defenses alter the strength and direction of natural selection on reproductive traits in common milkweed**

Ken A. Thompson<sup>1,2\*</sup>, Kaitlin A. Cory<sup>1</sup>, Marc T. J. Johnson<sup>1</sup>

<sup>1</sup>Department of Biology, University of Toronto Mississauga, Mississauga, ON, Canada, L5L 1C6

<sup>2</sup>Department of Zoology and Biodiversity Research Centre, University of British Columbia,

Vancouver, BC, Canada, V6T 1Z4

\*corresponding author; [email—kthomp1063@gmail.com](mailto:kthomp1063@gmail.com)

*Running head:* Induced defenses alter selection on floral traits

Data & R script (intended repository—Dryad):

<https://www.dropbox.com/sh/d4awjfl2fjugtra/AACyKmbMla7BjT9bZdyQ1c1oa?dl=0>

19 **Abstract**

20 Evolutionary biologists have long sought to understand the ecological processes that generate  
21 plant reproductive diversity. Recent evidence indicates that constitutive antiherbivore defenses  
22 can alter natural selection on reproductive traits, but it is unclear whether induced defenses will  
23 have the same effect and whether reduced foliar damage in defended plants is the cause of this  
24 pattern. In a factorial field experiment using common milkweed, *Asclepias syriaca*, we induced  
25 plant defenses using jasmonic acid (JA) and imposed foliar damage using scissors. We found  
26 that JA-induced plants experienced selection for more inflorescences that were smaller in size  
27 (fewer flowers), while control plants only experienced a trend toward selection for larger  
28 inflorescences (more flowers); all effects were independent of foliar damage. Our results  
29 demonstrate that induced defenses can alter both the strength and direction of selection on  
30 reproductive traits, and suggest that antiherbivore defenses may promote the evolution of plant  
31 reproductive diversity.

32

33

34 **Key words:** Display size; floral traits; herbivory; induced resistance; induced response; jasmonic  
35 acid; milkweed; phenotypic selection; quantitative genetics.

36 Understanding the ecological and evolutionary processes that have generated the astounding  
37 diversity of plant reproductive traits is an important and longstanding problem in evolutionary  
38 biology (Barrett, 2010). Although plant-pollinator interactions have played a major role in this  
39 diversification (Stebbins 1970; Harder and Barrett 2007), it is increasingly apparent that both  
40 herbivores and antiherbivore defenses have also contributed to the evolution of plant  
41 reproductive diversity (Galen, 1999; Irwin *et al.*, 2004; Armbruster *et al.*, 2009; Hanley *et al.*,  
42 2009; Thompson & Johnson, 2016). While we are beginning to understand how herbivores can  
43 directly select on reproductive traits (Strauss & Whittall, 2006; Carr & Eubanks, 2014), we know  
44 relatively little about the ecological mechanisms underpinning the evolutionary interactions  
45 between plant defense and reproduction (Campbell, 2014; Johnson *et al.*, 2015). Here, we test  
46 whether induced responses associated with chemical and physical defense traits (hereafter  
47 ‘induced defenses’ *sensu* Karban and Baldwin [1997]) alter natural selection on plant  
48 reproductive traits.

49         Antiherbivore defenses may alter natural selection on plant reproductive traits through  
50 two non-mutually exclusive mechanisms. First, allocation trade-offs between defense and  
51 reproduction may cause investment in defenses to directly reduce reproductive fitness. Such a  
52 trade-off could drive selection for increased allocation into reproduction in favour of reduced  
53 allocation to defense, and vice versa (Thompson & Johnson, 2016). Numerous studies have  
54 shown that induced defenses can change reproductive trait expression (e.g., Hoffmeister *et al.*  
55 2016) and fitness (e.g., Schuman *et al.* 2012), but none have tested whether induced defenses  
56 alter selection on reproductive traits. Second, because herbivores and pollinators both exert  
57 selection on reproductive traits, if defenses alter interactions with either of these selective agents,  
58 then phenotypic variation for defense could be associated with patterns of natural selection on

59 reproductive traits (Thompson & Johnson, 2016). While there are theoretical reasons to expect  
60 that antiherbivore defenses can alter natural selection on plant reproductive traits (Johnson *et al.*,  
61 2015), there is currently very little empirical evidence to support this hypothesis.

62         A previous study demonstrated that genetic variation in constitutive defenses  
63 (cyanogenesis within *Trifolium repens*) can alter natural selection on reproductive traits  
64 (Thompson & Johnson, 2016), but it is unclear whether induced defenses can have similar  
65 effects. While both constitutive and induced defenses increase fitness in the presence of  
66 herbivores, they differ in that constitutive defenses are always present while induced defenses  
67 increase following interactions with herbivores (Karban & Baldwin, 1997). Several studies have  
68 shown that, like constitutive defenses, induced defenses can reduce reproductive fitness through  
69 allocation trade-offs (Strauss, 1997; Agrawal *et al.*, 1999; Lucas-Barbosa, 2015), and can alter  
70 both floral herbivory and pollination (Heil, 2002; Strauss *et al.*, 2002; McCall & Karban, 2006;  
71 Kessler *et al.*, 2011). These observations collectively suggest that induced defenses might alter  
72 natural selection on reproductive traits.

73         Despite the similarities between constitutive and induced defenses, they have several  
74 important differences that preclude the assertion that both types of defense should similarly alter  
75 natural selection on reproductive traits. Constitutive and induced defenses may differ in their  
76 associated costs, because constitutive defenses are always expressed, whereas induced defenses  
77 are expressed only in response to specific stimuli (Karban & Myers, 1989). Alternatively,  
78 induced responses to herbivory can trigger ‘reproductive escape’ whereby plants drastically  
79 increase investment into reproduction (Lucas-Barbosa *et al.*, 2013). Constitutive and induced  
80 defenses may also have different effects on pollination and herbivory. Induced responses can  
81 change floral morphology and scent (Hoffmeister *et al.*, 2016), trigger the release of volatiles

82 that attract parasitoids of herbivores (Schuman *et al.*, 2012; Gols *et al.*, 2015), and have unique  
83 effects on herbivore population dynamics and distributions (Underwood & Rausher, 2002;  
84 Underwood *et al.*, 2005; Rubin *et al.*, 2015). Because induced and constitutive defenses may  
85 differ in their associated costs, and their effects on pollination and herbivory, they may differ in  
86 how they influence selection on reproductive traits. Given these differences, experiments that  
87 manipulate induced defense are needed to advance our general understanding of how defenses  
88 alter natural selection on plant reproductive traits.

89         When investigating the phenotypic consequences of induced defenses, it is essential to  
90 decouple the effects of tissue damage caused by herbivores from the effects of a change in  
91 defensive phenotype. This is because herbivory has two main effects on plants: first, it removes  
92 tissue that could otherwise be used in photosynthesis; second, it frequently induces chemical and  
93 physical defenses. Thus, in natural systems where foliar damage induces defenses it can be  
94 difficult to attribute effects to one or the other. With respect to defense-mediated changes in  
95 selection, it is especially important to control for foliar damage, because as with defense, foliar  
96 damage can affect allocation to reproduction and attractiveness to pollinators (Strauss *et al.*,  
97 1996). The independent effects of leaf tissue removal and induced defenses can be decoupled by  
98 applying chemicals to induce the defenses of a plant, and by removing leaf tissue mechanically  
99 without inducing defenses. Experimental decoupling of defense and foliar damage is biologically  
100 meaningful because species can possess genetic variation for induced responses to a given  
101 amount of herbivory (Agrawal *et al.*, 2002), such that the degree to which foliar damage and  
102 defense co-vary differs among genotypes. In addition, there are cases where foliar herbivory  
103 does not upregulate defenses (Karban & Baldwin, 1997), and where defenses are induced in the  
104 absence of damage (e.g., by volatiles; Heil and Karban [2010]). By independently manipulating

105 foliar damage and induced defenses, it becomes possible to quantify their respective  
106 contributions to defense-mediated changes in selection on reproductive traits.

107         Here, we report the results of a field experiment designed to test whether induced plant  
108 defenses and simulated foliar damage alter natural selection on reproductive traits in common  
109 milkweed, *Asclepias syriaca* L. (Apocynaceae). Our specific research question was: do induced  
110 plant defenses alter natural selection on reproductive traits independently of foliar damage? We  
111 hypothesized that induced defenses would alter selection on reproductive traits via resource-  
112 allocation trade-offs between defense and reproduction, or by altering patterns of pollination  
113 and/or herbivory. Evaluating whether induced defenses alter selection on reproductive traits will  
114 advance our understanding of the ecological mechanisms driving evolutionary interactions  
115 between plant defense and reproduction.

116

## 117 **Materials & Methods**

118 *Study system*—Common milkweed, *Asclepias syriaca*, is a perennial plant native to eastern  
119 North America (Uva *et al.*, 1997). Plants reproduce vegetatively via rhizomes, and sexually via  
120 highly modified flowers (Fig. S1) arranged into umbels (Kephart, 1983). Five nectar-filled hoods  
121 surround the fused male and female reproductive organs. The corolla is reflexed and obscures the  
122 calyx (Fig. S1). Rather than individual pollen grains, milkweed pollen are aggregated within  
123 highly derived structures called pollinia. Pollinia are removed in pairs from flowers as they  
124 attach to insect legs and tongues.

125         Milkweeds (*Asclepias* spp.) are well known for their defensive mechanisms. The  
126 common name, milkweed, derives from the thick white latex that exudes from laticifers  
127 following mechanical damage to tissues, and it functions by physically impeding herbivores

128 (Dussourd & Eisner, 1987; Agrawal & Konno, 2009). Milkweeds also contain cardenolides,  
129 which disrupt sodium-potassium regulation in cells and are toxic to most animals (Malcolm,  
130 1991; Dobler *et al.*, 2012; Zhen *et al.*, 2012). Production of these defenses is upregulated  
131 following attack by herbivores, which subsequently reduces herbivory (Van Zandt & Agrawal,  
132 2004). Induction of cardenolides and latex in milkweeds is regulated by the steroid hormone,  
133 jasmonic acid (hereafter ‘JA’) (Agrawal *et al.*, 2012), and exogenous JA application upregulates  
134 latex and cardenolide production (Rasmann *et al.*, 2009; Agrawal *et al.*, 2012). Milkweed  
135 defense traits exhibit heritable variation within populations (Agrawal, 2004), are subject to  
136 selection by specialist herbivores (Agrawal, 2005b), and have diverged among species in the  
137 genus (Agrawal & Fishbein, 2008; Agrawal *et al.*, 2009). We refer to induction of cardenolides  
138 and latex following herbivory or JA application as an induced ‘defense’ because of the  
139 substantial evidence that these traits are involved in defense against herbivores.

140 *Experimental design*—To determine whether induced defenses alter selection on plant  
141 reproductive traits independently of foliar damage, we manipulated both induced defenses and  
142 foliar damage in a  $2 \times 6$  fully factorial field experiment (i.e., 12 treatment combinations) using  
143 156 naturally-occurring milkweed plants on and around (study location hidden during blind  
144 review) (approx. 1.25 km<sup>2</sup>; [-] N, [-] W; [-] m a.s.l.). We only included plants with no herbivore  
145 damage, and neighbouring plants were separated by at least 1.5 m to reduce the likelihood of  
146 sampling the same genet twice (La Rosa, 2015). We covered all plants during the second week of  
147 June 2014 with spun polyester bags (Pro 17, Agrofabric, Alpharetta, GA, USA), and tied the  
148 bags at the top and bottom of each plant to prevent access by insects (Fig. S1). As plants matured  
149 and formed flower buds, we tied the upper-portion of bags below the lowest buds (Fig. S1); this  
150 allowed for flower visitation while protecting vegetative parts from herbivores.

151 We experimentally manipulated induced plant defenses using a treatment with two levels  
152 (the ‘induction’ treatment). Plants were either assigned to a control group with no induction  
153 (‘control’ plants), or to a treatment group where we used the exogenous application of JA to  
154 induce defenses (‘JA-induced’ plants). We prepared a 0.5 mM JA solution by dissolving 100 mg  
155 JA (Sigma-Aldrich #77026-92-7) in 2mL of 99.5% acetone and diluting with 950 mL of distilled  
156 water; we also prepared a control solution that lacked dissolved JA but was otherwise identical to  
157 the treatment solution (Thaler *et al.*, 1996). This method has been used previously to induce  
158 defenses in *A. syriaca* (e.g., Mooney *et al.*, 2008). We applied either the JA or control solution to  
159 each plant by spraying every fully expanded leaf once (ca. 1 mL leaf<sup>1</sup>) during each of three  
160 applications spaced at two week intervals (13 & 27 June, 11 July); the first application occurred  
161 while plants were still undergoing vegetative growth and before any plants had flowered. At the  
162 time of initial treatment application, mean plant height was  $65.4 \pm 14.4$  [SD] cm and mean leaf  
163 number was  $11.49 \pm 2.43$ . We used intervals of two weeks to apply treatments because JA-  
164 induced chemical changes are maintained in other systems for at least 14 days (Thaler, 1999).

165 To decouple the effects of chemically induced defenses and foliar damage, we imposed a  
166 leaf-tissue removal treatment (hereafter the ‘damage’ treatment) that had six levels. We imposed  
167 our treatment by cutting each leaf on a plant with scissors to remove 0, 10, 20, 30, 40, or 50% of  
168 leaf tissue, which encompasses the natural range of damage that *A. syriaca* plants typically  
169 experience (Turcotte *et al.*, 2014). We imposed the damage treatment with multiple levels so we  
170 could detect any linear or non-linear effects of leaf removal on selection. Leaves were cut once at  
171 the start of the experiment, concurrently with the initial application of the induction treatment.  
172 We used scissors rather than herbivores because we explicitly wanted to determine the effects of  
173 defoliation in the absence of induced defenses; clipping with scissors should not have caused an



174 induced response because of an absence of herbivore saliva, which frequently elicits JA  
175 (Agrawal *et al.*, 1999; Musser *et al.*, 2002; Rodriguez-Saona *et al.*, 2002). This rationale is  
176 supported by data from Mooney *et al.* (2008), who found that exogenous JA-application—but  
177 not mechanical foliar damage—up-regulated the production of induced defenses in *A. syriaca* in  
178 ways that were similar to the effects of monarch (*Danaus plexippus*) caterpillar herbivory.

179         We measured several traits during our experiment. During initial treatment application,  
180 we measured plant height, and counted leaves and inflorescence buds. We recorded the first date  
181 of flowering for each plant, and measured several aspects of flower size: hood length & width,  
182 petal length & width, and the length and width of entire flowers (see Fig. S1). We measured  
183 these traits to the nearest 0.5 mm on up to five flowers from the lowest three inflorescences, or  
184 all inflorescences for plants with  $\leq 3$  inflorescences. To obtain mean values of these  
185 measurements for individual plants, we averaged all flower size measurements within  
186 inflorescences, and then across inflorescences. We counted the number of flowers within the  
187 inflorescences used for floral measurements, and refer to the mean number of flowers within  
188 inflorescences hereafter as ‘inflorescence size’. In addition, we recorded the total number of  
189 inflorescences that each plant initiated, hereafter referred to as ‘inflorescence number’. We  
190 harvested the aboveground vegetative biomass of each plant into paper bags at the end of the  
191 experiment. After drying plants for 72 h at 50 °C, we removed leaves and weighed the stem  
192 tissue as a measure of aboveground biomass. Leaves were removed to avoid including direct  
193 treatment effects (mass lost due to leaf tissue removal), or confounded variation in leaf  
194 abscission between treatments.

195         We recorded estimates of both male and female fitness. For male fitness, we counted the  
196 number of pollinia removed from five flowers from the lowest three inflorescences, or all

197 inflorescences for plants with  $\leq 3$  inflorescences. Pollinia removal can be accurately determined  
198 on flowers over their entire lifetime, including on senescing flowers. We took the mean number  
199 of pollinia removed from each inflorescence, and averaged that among inflorescences to estimate  
200 male fitness. Two studies have quantified the relationship between pollinia removal and seeds  
201 sired in milkweeds using genetic markers, and found them to be significantly correlated ( $r_{\text{Pearson}}$   
202 range: 0.44-0.47) (Broyles & Wyatt, 1990; La Rosa, 2015). These studies indicate that a large  
203 fraction of pollinia removed by pollinators do not sire seeds. Thus, our measure of male fitness  
204 represents the upper limit of an individual's siring success; we acknowledge that this metric is an  
205 imperfect estimate of true male fitness, and a more accurate estimate would require molecular  
206 markers and exhaustive sampling of the population. As an estimate of female fitness, we  
207 harvested ripe fruits and counted the number of viable seeds. We did not include measures of  
208 fitness related to vegetative reproduction because *A. syriaca* is a long-lived plant, and it is  
209 difficult to determine the belowground rhizome connections between ramets. Nevertheless, this  
210 did not affect our ability to effectively address our research questions about whether induced  
211 defenses and herbivory alter selection on reproductive traits.

212

213 *Statistical analysis*—Before analysis, we assessed whether our data met assumptions of  
214 normality and homogeneity of variance. We transformed some traits to meet the assumptions of  
215 our analyses (Table S1). We calculated pairwise correlations between all measured traits to test  
216 for multicollinearity. The six flower size traits were positively correlated (mean  $r_{\text{Pearson}} = 0.62$ ),  
217 so we collapsed them into two principal components subject to “varimax” rotation using the R  
218 package ‘psych’ (Revelle, 2015). The first principal component (PC1) was highly positively  
219 correlated with the three flower width measurements (hereafter *floral width PC*), and the other

220 principal component (PC2) was positively correlated with the three flower length measurements  
221 (hereafter *floral length PC*); PC1 and PC2 explained 68% and 14% of variation in the data,  
222 respectively (Table S2). All pairwise correlations between remaining traits were  $< 0.7$  after  
223 collapsing floral measurements except between inflorescence number and biomass ( $r_{\text{Pearson}} =$   
224  $0.78$ ); we retained both variables in spite of this correlation because of an *a priori* interest in  
225 analysing differences in defense-mediated changes in selection on both of these traits (Table S3,  
226 S4). We also calculated coefficients of phenotypic variation as  $CV_p = 100(V_p^{0.5} / \mu_i)$ , where  $\mu_i$  is  
227 the untransformed mean of trait  $i$  (Houle, 1992). For all subsequent analyses we standardized  
228 traits to a mean of 0 and a standard deviation of 1.

229 We also used univariate ANOVA to test whether the induction and damage treatments  
230 affected the expression of phenotypic traits and fitness components. This allowed us to determine  
231 whether there were any allocation costs associated with defense, and to evaluate the phenotypic  
232 effects of leaf damage. If damage or induced defenses directly change the expression of a  
233 reproductive trait, this could alter selection on the trait.

234 To determine if JA-induction altered natural selection on plant reproductive traits  
235 independently of foliar damage, we used multivariate phenotypic selection analyses (Lande &  
236 Arnold, 1983). We first calculated relative fitness ( $w_i$ ) across all plants, standardized trait values,  
237 then ran a linear model regressing relative fitness values against the main effects of each  
238 treatment (induction and damage), each phenotypic trait, trait  $\times$  induction interactions, and trait  $\times$   
239 damage interactions. Induction was coded as a categorical variable with two levels, and damage  
240 was a continuous variable with six levels. The model took the following form:

241  $w_i = \textit{intercept} + \textit{induction treatment} + \textit{damage treatment} + \textit{floral width PC} + \textit{floral length PC}$   
242  $+ \textit{first flower} + \textit{inflorescence number} + \textit{inflorescence size} + \textit{biomass} + \textit{trait} \times \textit{induction}$   
243  $\textit{treatment interactions} + \textit{trait} \times \textit{damage treatment interactions} + \textit{error}.$

244 Three-way trait  $\times$  induction treatment  $\times$  damage treatment terms and non-linear selection  
245 coefficients were included in preliminary models, but all were nonsignificant ( $P > 0.5$ ) and are  
246 not reported. Significant main effects for treatments indicate that the treatment influenced fitness,  
247 and significant main effects for traits indicate that the trait was under directional selection. A  
248 significant trait  $\times$  treatment interaction indicates that the treatment altered directional selection  
249 on the trait (i.e., the confidence intervals on selection gradients for different treatment levels are  
250 non-overlapping).

251 We analyzed multivariate selection models using a multi-model selection procedure  
252 implemented using the *dredge* function in the R package ‘MuMIn’ (Barton, 2015). This  
253 procedure tests models that span all possible combinations of variables (except for models  
254 containing interactions without the corresponding main effects). We took weighted-averages  
255 from all models within 2  $\Delta$ AIC of the best model—where better fitting models are weighted  
256 more heavily—to determine final model-averaged parameters. The best model had 12 variables,  
257 and statistically equivalent models (within 2  $\Delta$ AIC) had between 7 and 14 variables. We  
258 interpreted the ‘full’ model output from the analysis because parameter estimates in the  
259 ‘conditional’ output are biased away from zero; thus, the ‘full’ model estimates are more  
260 conservative (Barton, 2015). We note that the general conclusions of the present study do not  
261 change when the multivariate selection model is analyzed using standard multiple regression (see  
262 R script).

263           Because induced defenses altered selection on traits (see **Results**), we quantified patterns  
264 of selection on JA-induced and control plants separately. We restrict these analyses to traits  
265 where we detected significant trait  $\times$  induction treatment interactions. To accomplish this, we  
266 analyzed linear models that included all terms from the dredge model with the lowest AIC (i.e.,  
267 the best fitting individual model; see Table 1) and extracted residuals for fitness and trait values  
268 using the approach for partial variance in multiple regression analyses as explained by SAS (SAS  
269 Institute Inc, 2009). Specifically, we extracted fitness residuals from the model after removing  
270 both the focal trait and the focal trait  $\times$  induction treatment interaction term. We then extracted  
271 trait residuals from an identical model with the standardized trait as the response variable rather  
272 than relative fitness. Regression of fitness residuals on trait residuals estimates the selection  
273 gradient on the focal trait while controlling for other measured traits. We partitioned the data  
274 across treatments, and then analyzed linear models of fitness residuals on trait residuals to  
275 estimate the selection gradient in each treatment separately. All data were analyzed using R  
276 v.3.0.3. (R Core Team, 2014), and all R-code used to generate results and figures is available  
277 online.

278

## 279 **Results**

### 280 *Treatment effects on traits and fitness*

281 We did not detect direct effects of the induction treatment or the damage treatment on trait values  
282 or fitness in our univariate analyses (Table S5). There were nearly significant effects of the  
283 induction treatment on inflorescence size (19% larger in JA-induced plants;  $P = 0.07$ ) and  
284 biomass (10% smaller in JA-induced plants;  $P = 0.10$ ). In our multivariate selection model,  
285 which accounted for covariance among traits, we detected a significant effect of JA-induction on

286 fitness, where JA-induced plants produced 20% fewer seeds than control plants ( $\beta = -0.51 \pm 0.20$   
287 [SEM],  $P = 0.012$ ) (Table 1). We did not detect an effect of damage on fitness in our multivariate  
288 analysis.

289

### 290 *Population-wide patterns of natural selection*

291 We observed natural selection through female fitness, but not male fitness, in our multivariate  
292 selection analyses (Table 1). At the population level, there was significant directional selection  
293 for greater inflorescence size ( $\beta = 0.32 \pm 0.16$ ,  $P = 0.047$ ) and biomass ( $\beta = 0.57 \pm 0.16$ ,  $P <$   
294  $0.001$ ) via female fitness. We found no evidence that selection was operating via male fitness on  
295 any trait main effect or trait  $\times$  treatment interaction (Table 1), despite large variation in pollinia  
296 removal ( $CV_p = 98.8$ ; Table S1).

297

### 298 *Defense-mediated changes in natural selection*

299 Phenotypic selection analyses revealed that the induction treatment altered the strength and  
300 direction of natural selection on plant reproductive traits via female fitness (Table 1; Fig. 1).  
301 Specifically, JA-induced plants experienced selection for more inflorescences ( $\beta_{\text{JA-induced—}}$   
302  $\text{inflorescence number} = 2.81 \pm 0.98$ ,  $P = 0.003$ ), whereas selection in control plants was non-significant  
303 ( $\beta_{\text{control—inflorescence number}} = -0.60 \pm 0.58$ ,  $P = 0.312$ ); the slopes were significantly different  
304 between the two treatments (inflorescence number  $\times$  induction:  $P = 0.001$ ). JA-induced plants  
305 also experienced selection for smaller inflorescences ( $\beta_{\text{JA-induced—inflorescence size}} = -1.19 \pm 0.48$ ,  $P =$   
306  $0.017$ ), while control plants experienced a trend toward opposing selection for larger  
307 inflorescences ( $\beta_{\text{control—inflorescence size}} = 0.74 \pm 0.38$ ,  $P = 0.056$ ); these slopes also significantly  
308 differed between treatments (inflorescence size  $\times$  induction:  $P = 0.004$ ). Finally, we observed

309 significant positive selection on biomass in control plants ( $\beta_{\text{control—biomass}} = 1.47 \pm 0.42$ ,  $P <$   
310 0.001), but found no evidence for selection on biomass in JA-induced plants ( $\beta_{\text{JA-induced—biomass}} =$   
311  $0.17 \pm 0.37$ ,  $P = 0.645$ ); as above, these slopes were significantly different between treatments  
312 (biomass  $\times$  induction:  $P = 0.033$ ) (Fig. S1). No trait  $\times$  damage treatment interactions were  
313 significant.

314

## 315 **Discussion**

316 Studies seldom consider antiherbivore defenses when investigating the evolution of plant  
317 reproductive diversity. Recent research, however, highlights independent roles for both  
318 herbivory and antiherbivore defenses in shaping natural selection on plant reproductive traits  
319 (Campbell, 2014; Carr & Eubanks, 2014; Johnson *et al.*, 2015; Thompson & Johnson, 2016). In  
320 this study, we asked whether induced plant defenses alter natural selection on reproductive traits  
321 independently of foliar damage. Our results demonstrate that selection on both inflorescence size  
322 and number changed following the chemical induction of plant defenses, whereas manual  
323 defoliation did not alter selection on any trait. Taken together, our results suggest that plastic  
324 phenotypic variation in defense can alter both the strength (coefficient magnitude) and direction  
325 (coefficient sign) of natural selection on plant reproductive traits.

326

### 327 *Causes of defense-mediated changes in natural selection*

328 Resource allocation trade-offs between defense and reproduction, where fitness is reduced in  
329 highly defended plants, may cause selection for increased allocation to reproduction. JA-induced  
330 plants produced fewer seeds than control plants in our experiment, suggesting that there was a  
331 direct fitness cost of inducing defenses in *A. syriaca* (Strauss *et al.* 2002). In general,

332 reproduction through female function is more resource-limited than through male function (Haig  
333 & Westoby, 1988), and resource limitation is thought to be the most important determinant of  
334 seed production in milkweeds (Wyatt & Broyles, 1994). We found that JA-induced plants  
335 experienced selection for more inflorescences, but we did not detect selection on inflorescence  
336 number in control plants. This may represent selection for higher investment into reproduction in  
337 JA-induced plants (Herms & Mattson, 1992). Milkweeds can mature few fruits per inflorescence,  
338 and large inflorescences may be especially inefficient in JA-induced plants if many potential  
339 fruits are aborted because of insufficient resources. The observed selection for more  
340 inflorescences that are smaller in size among JA-induced plants could thus be selection to  
341 partition flower production among more inflorescences in order to increase fruit set per  
342 inflorescence. Simultaneous manipulation of defense and resource environment is required to test  
343 these hypotheses.

344         In addition to resource allocation trade-offs, altered interactions with agents of selection  
345 on plant reproductive traits could cause the observed defense-mediated changes in natural  
346 selection. A previous study in *A. syriaca* found that herbivores destroyed > 90% of the smallest  
347 inflorescences but negligibly damaged large inflorescences (Willson & Rathcke, 1974). Thus,  
348 large inflorescences may allow milkweed plants to tolerate herbivory (Strauss & Agrawal, 1999).  
349 Our data indicates that JA-induced plants experienced selection for smaller inflorescences, while  
350 control plants experienced a trend toward selection for larger inflorescences. Induced defenses  
351 can reduce florivory (McCall & Karban, 2006), and thus selection for larger inflorescences in  
352 (undefended) control plants may be selection for tolerance to herbivore damage. Experimental  
353 manipulation of both florivory and defense are needed to test this hypothesis.

354



355 *Novel contributions of this study*

356 Our study is the second to demonstrate that antiherbivore defenses can alter natural selection on  
357 plant reproductive traits. Thompson and Johnson (2016) showed that the cyanogenesis  
358 polymorphism of *Trifolium repens* alters natural selection on petal and inflorescence size. The  
359 present study builds on this result in two key ways. First, while the previous study manipulated  
360 genetic variation for a constitutive defense, we manipulated induced defenses. That our results  
361 are qualitatively similar indicates that both constitutive and induced defense, and both genetic  
362 and plastic variation for defense, can alter natural selection on reproductive traits. Second, we  
363 experimentally manipulated foliar damage, while Thompson and Johnson (2016) measured  
364 natural herbivore damage and included it as a covariate. Defense and herbivory were  
365 significantly correlated in their study, and thus our study provides a stronger test of the  
366 hypothesis that defense-mediated changes in selection on reproductive traits are independent of  
367 foliar damage. Thus, our study builds on that of Thompson and Johnson (2016) and provides  
368 additional evidence in support of the hypothesis that plant defenses can alter natural selection on  
369 reproductive traits.

370 Common milkweed, *Asclepias syriaca*, is a model plant system for studying the  
371 evolutionary ecology of induced responses to herbivory (Malcolm & Zalucki, 1996). Identifying  
372 costs associated with induced responses is a major goal in research on induced responses  
373 (Agrawal, 2005a), and our study provides the first evidence of fitness costs associated with  
374 induced responses in milkweeds. Our results generate testable hypotheses aimed at addressing  
375 the ecological mechanisms underlying costs—and ecological consequences—of induced  
376 responses in this system. Testing these hypotheses will advance our understanding of the

377 evolutionary ecology of induced responses by furthering the development of milkweeds as a  
378 model system for the study of plant-insect interactions.

379

### 380 *Caveats*

381 We acknowledge several limitations of our experiment and analyses. First, the most accurate  
382 estimates of selection utilize breeding values, rather than phenotypic variation among  
383 individuals, because environmental covariance between traits and fitness can bias estimates of  
384 selection in the field (Rausher, 1992; Stinchcombe *et al.*, 2002). While our use of phenotypic  
385 data could bias overall estimates of selection, we applied our treatments randomly and it is  
386 unlikely that environmental effects would influence our conclusion that induced defenses alter  
387 selection. Second, *A. syriaca* is a highly clonal perennial, and our estimates of fitness likely  
388 capture a small portion of lifetime fitness. However, our methods still allow us to accurately  
389 quantify defense-mediated changes in selection within a generation. Third, although we found no  
390 evidence that natural selection was operating through male fitness, our male fitness metric may  
391 be too coarse to detect more subtle patterns. Fourth, we did not verify differences in defensive  
392 properties across JA-induced and control plants; other studies have confirmed the efficacy of  
393 identical treatments in *A. syriaca* (e.g., Mooney *et al.*, 2008), and the strong effects of induction  
394 treatment on fitness and selection further indicate that our treatments altered plant physiology.  
395 Last, manual defoliation did not affect traits or fitness, which suggests that our damage treatment  
396 was not severe enough to impose fitness costs on *A. syriaca*. We note that our result is consistent  
397 with other studies demonstrating low fitness consequences of defoliation in *A. syriaca* (e.g.,  
398 Hochwender *et al.*, 2000), and that higher levels of damage would have been biologically  
399 unrealistic for *A. syriaca* (mean % leaf herbivory in the field =  $4.0 \pm 1.5\%$ , min = 0%, max =

400 24.2%; Turcotte et al. [2014]). Despite these caveats, our field experiment provides strong  
401 evidence that induced defences can alter natural selection on reproductive traits via female  
402 fitness in a natural milkweed population.

403

#### 404 *Conclusions*

405 Understanding the factors that underlie the diversification of plant reproductive structures is an  
406 important area of research in evolutionary biology (Barrett, 2010). Recent evidence demonstrates  
407 that both herbivores and antiherbivore defenses promote plant reproductive diversity on both  
408 macroevolutionary (Armbruster, 1997; Armbruster *et al.*, 2009; Hanley *et al.*, 2009), and  
409 microevolutionary timescales (Thompson & Johnson, 2016). Our results demonstrate that  
410 induced plant defenses can alter both the strength and direction of natural selection on  
411 reproductive traits independently of foliar damage. While the available evidence suggests that  
412 antiherbivore defenses can alter natural selection on plant reproductive traits, very little is known  
413 about the mechanisms responsible for these patterns. It is also currently uncertain if disruptive  
414 selection associated with defense can ultimately drive phenotypic divergence within populations.  
415 Experimental studies that manipulate defense and resource limitation, and defense and  
416 pollinators and/or herbivores, are needed to fully understand the ecological mechanisms through  
417 which antiherbivore defenses alter natural selection on plant reproductive traits.

418

419 **References**

- 420 Agrawal, A.A. 2005a. Future directions in the study of induced plant responses to herbivory. *J.*  
421 *Chem. Ecol.* **115**: 97–105.
- 422 Agrawal, A.A. 2005b. Natural selection on common milkweed (*Asclepias syriaca*) by a  
423 community of specialized insect herbivores. *Evol. Ecol. Res.* **7**: 651–667.
- 424 Agrawal, A.A. 2004. Resistance and susceptibility of milkweed: Competition, root herbivory,  
425 and plant genetic variation. *Ecology* **85**: 2118–2133.
- 426 Agrawal, A.A., Conner, J.K., Johnson, M.T.J. & Wallsgrove, R. 2002. Ecological genetics of an  
427 induced plant defense against herbivores: additive genetic variance and costs of phenotypic  
428 plasticity. *Evolution* **56**: 2206–2213.
- 429 Agrawal, A.A. & Fishbein, M. 2008. Phylogenetic escalation and decline of plant defense  
430 strategies. *Proc. Natl. Acad. Sci. USA* **105**: 10057–10060.
- 431 Agrawal, A.A., Fishbein, M., Halitschke, R., Hastings, A.P., Rabosky, D.L. & Rasmann, S.  
432 2009. Evidence for adaptive radiation from a phylogenetic study of plant defenses. *Proc.*  
433 *Natl. Acad. Sci. USA* **106**: 18067–18072.
- 434 Agrawal, A.A., Kearney, E.E., Hastings, A.P. & Ramsey, T.E. 2012. Attenuation of the  
435 jasmonate burst, plant defensive traits, and resistance to specialist monarch caterpillars on  
436 shaded common milkweed (*Asclepias syriaca*). *J. Chem. Ecol.* **38**: 893–901.
- 437 Agrawal, A.A. & Konno, K. 2009. Latex: A model for understanding mechanisms, ecology, and  
438 evolution of plant defense against herbivory. *Annu. Rev. Ecol. Evol. Syst.* **40**: 311–331.
- 439 Agrawal, A.A., Strauss, S.Y. & Stout, M.J. 1999. Costs of induced responses and tolerance to  
440 herbivory in male and female fitness components of wild radish. *Evolution* **53**: 1093–1104.
- 441 Armbruster, W.S. 1997. Exaptations link evolution of plant-herbivore and plant-pollinator

- 442 interactions: A phylogenetic inquiry. *Ecology* **78**: 1661–1672.
- 443 Armbruster, W.S., Lee, J. & Baldwin, B.G. 2009. Macroevolutionary patterns of defense and  
444 pollination in *Dalechampia* vines: adaptation, exaptation, and evolutionary novelty. *Proc.*  
445 *Natl. Acad. Sci. USA* **106**: 18085–18090.
- 446 Barrett, S.C.H. 2010. Understanding plant reproductive diversity. *Philos. Trans. R. Soc. B Biol.*  
447 *Sci.* **365**: 99–109.
- 448 Barton, K. 2015. MuMIn: Multi-model inference. R package version 1.115.1. [http://CRAN.R-](http://CRAN.R-project.org/package=MuMIn)  
449 [project.org/package=MuMIn](http://CRAN.R-project.org/package=MuMIn).
- 450 Broyles, S. & Wyatt, R. 1990. Paternity analysis in a natural population of *Asclepias exaltata*:  
451 Multiple paternity, functional gender, and the “pollen-donation hypothesis.” *Evolution* **44**:  
452 1454–1468.
- 453 Campbell, S.A. 2014. Ecological mechanisms for the coevolution of mating systems and  
454 defence. *New Phytol.* **205**: 1047–1053.
- 455 Carr, D.E. & Eubanks, M.D. 2014. Interactions between insect herbivores and plant mating  
456 systems. *Annu. Rev. Entomol.* **59**: 185–203.
- 457 Dobler, S., Dalla, S., Wagschal, V. & Agrawal, A.A. 2012. Community-wide convergent  
458 evolution in insect adaptation to toxic cardenolides by substitutions in the Na, K-ATPase.  
459 *Proc. Natl. Acad. Sci. USA* **109**: 13040–13045.
- 460 Dussourd, D.E. & Eisner, T. 1987. Vein-cutting behavior: Insect counterploy to the latex defense  
461 of plants. *Science* **237**: 898–901.
- 462 Galen, C. 1999. Why do flowers vary? *Bioscience* **49**: 631–640.
- 463 Gols, R., Wagenaar, R., Poelman, E.H., Kruidhof, H.M., van Loon, J.J.A. & Harvey, J.A. 2015.  
464 Fitness consequences of indirect plant defence in the annual weed, *Sinapis arvensis*. *Funct.*

- 465 *Ecol.* **29**: 1019–1025.
- 466 Haig, D. & Westoby, M. 1988. On limits to seed production. *Am. Nat.* **131**: 757–759.
- 467 Hanley, M.E., Lamont, B.B. & Armbruster, W.S. 2009. Pollination and plant defence traits co-  
468 vary in Western Australian *Hakeas*. *New Phytol.* **182**: 251–260.
- 469 Harder, L.D. & Barrett, S.C.H., 2007. *Ecology and Evolution of Flowers*. Oxford University  
470 Press, Oxford, UK.
- 471 Heil, M. 2002. Ecological costs of induced resistance. *Curr. Opin. Plant Biol.* **5**: 345–350.
- 472 Heil, M. & Karban, R. 2010. Explaining evolution of plant communication by airborne signals.  
473 *Trends Ecol. Evol.* **25**: 137–144.
- 474 Herms, D.A. & Mattson, W.J. 1992. The dilemma of plants: To grow or defend. *Q. Rev. Biol.* **67**:  
475 283–335.
- 476 Hochwender, C.G., Marquis, R.J. & Stowe, K.A. 2000. The potential for and constraints on the  
477 evolution of compensatory ability in *Asclepias syriaca*. *Oecologia* **122**: 361–370.
- 478 Hoffmeister, M., Wittköpper, N. & Junker, R.R. 2016. Herbivore-induced changes in flower  
479 scent and morphology affect the structure of flower-visitor networks but not plant  
480 reproduction. *Oikos* **125**: 1241–1249.
- 481 Houle, D. 1992. Comparing evolvability and variability of quantitative traits. *Genetics* **130**: 195–  
482 204.
- 483 Irwin, R.E., Adler, L.S. & Brody, A.K. 2004. The dual role of floral traits: Pollinator attraction  
484 and plant defense. *Ecology* **85**: 1503–1511.
- 485 Johnson, M.T.J., Campbell, S.A. & Barrett, S.C.H. 2015. Evolutionary interactions between  
486 plant reproduction and defense against herbivores. *Annu. Rev. Ecol. Evol. Syst.* **46**: 191–  
487 213.

- 488 Karban, R. & Baldwin, I.T. 1997. *Induced Responses to Herbivory*. University of Chicago Press,  
489 Chicago, IL.
- 490 Karban, R. & Myers, J.H. 1989. Induced plant responses to herbivory. *Annu. Rev. Ecol. Syst.* **20**:  
491 331–348.
- 492 Kephart, S.R. 1983. The partitioning of pollinators among three species of *Asclepias*. *Ecology*  
493 **64**: 120–133.
- 494 Kessler, A., Halitschke, R. & Poveda, K. 2011. Herbivory-mediated pollinator limitation:  
495 Negative impacts of induced volatiles on plant-pollinator interactions. *Ecology* **92**: 1769–  
496 1780.
- 497 La Rosa, R.J. 2015. Floral evolution in milkweeds: Evidence for selection past and present.  
498 Michigan State University.
- 499 Lande, R. & Arnold, S.J. 1983. The measurement of selection on correlated characters. *Evolution*  
500 **37**: 1210–1226.
- 501 Lucas-Barbosa, D. 2015. Integrating studies on plant-pollinator and plant-herbivore interactions.  
502 *Trends Plant Sci.* **21**: 125–133.
- 503 Lucas-Barbosa, D., Van Loon, J.J.A., Gols, R., Van Beek, T.A. & Dicke, M. 2013. Reproductive  
504 escape: Annual plant responds to butterfly eggs by accelerating seed production. *Funct.*  
505 *Ecol.* **27**: 245–254.
- 506 Malcolm, S.B. 1991. Cardenolide-mediated interactions between plants and herbivores. In:  
507 *Herbivores: Their interactions with secondary plant metabolites, Vol. I: The chemical*  
508 *participants* (G. A. Rosenthal & M. R. Berenbaum, eds), pp. 251–296. Academic Press, San  
509 Diego, CA.
- 510 Malcolm, S.B. & Zalucki, M.P. 1996. Milkweed latex and cardenolide induction may resolve the

- 511 lethal plant defence paradox. *Entomol. Exp. Appl.* **80**: 193–196.
- 512 McCall, A.C. & Karban, R. 2006. Induced defense in *Nicotiana attenuata* (Solanaceae) fruit and  
513 flowers. *Oecologia* **146**: 566–571.
- 514 Mooney, K.A., Jones, P. & Agrawal, A.A. 2008. Coexisting congeners: Demography,  
515 competition, and interactions with cardenolides for two milkweed-feeding aphids. *Oikos*  
516 **117**: 450–458.
- 517 Musser, R.O., Hum-Musser, S.M., Eichenseer, H., Peiffer, M., Ervin, G., Murphy, J.B., *et al.*  
518 2002. Herbivory: caterpillar saliva beats plant defences. *Nature* **416**: 599–600.
- 519 R Core Team. 2014. R: A language and environment for statistical computing, Vienna, Austria.  
520 <http://www.R-project.org/>.
- 521 Rasmann, S., Johnson, M.D. & Agrawal, A.A. 2009. Induced responses to herbivory and  
522 jasmonate in three milkweed species. *J. Chem. Ecol.* **35**: 1326–1334.
- 523 Rausher, M.D. 1992. The measurement of selection on quantitative traits: Biases due to  
524 environmental covariances between traits and fitness. *Evolution* **46**: 616–626.
- 525 Revelle, W. 2015. psych: Procedures for Personality and Psychological Research. v 1.5.6.  
526 <https://cran.r-project.org/web/packages/psych/index.html>. Northwestern University,  
527 Evanston, Illinois, USA.
- 528 Rodriguez-Saona, C., Crafts-Brandner, S.J., Williams, L.I. & Paré, P.W. 2002. *Lygus hesperus*  
529 feeding and salivary gland extracts induce volatile emissions in plants. *J. Chem. Ecol.* **28**:  
530 1733–1747.
- 531 Rubin, I.N., Ellner, S.P., Kessler, A. & Morrell, K.A. 2015. Informed herbivore movement and  
532 interplant communication determine the effects of induced resistance in an individual-based  
533 model. *J. Anim. Ecol.* **84**: 1273–1285.



- 534 SAS Institute Inc. 2009. SAS/STAT 9.2 User's Guide.
- 535 Schuman, M.C., Barthel, K. & Baldwin, I.T. 2012. Herbivory-induced volatiles function as  
536 defenses increasing fitness of the native plant *Nicotiana attenuata* in nature. *Elife* **2012**.
- 537 Stebbins, G.L. 1970. Adaptive radiation of reproductive characteristics in angiosperms, I:  
538 Pollination mechanisms. *Annu. Rev. Ecol. Syst.* **1**: 307–326.
- 539 Stinchcombe, J.R., Rutter, M.T., Burdick, D.S., Tiffin, P., Rausher, M.D. & Mauricio, R. 2002.  
540 Testing for environmentally induced bias in phenotypic estimates of natural selection:  
541 theory and practice. *Am. Nat.* **160**: 511–523.
- 542 Strauss, S.Y. 1997. Floral characters link herbivores, pollinators, and plant fitness. *Ecology* **78**:  
543 1640–1645.
- 544 Strauss, S.Y. & Agrawal, A.A. 1999. The ecology and evolution of plant tolerance to herbivory.  
545 *Trends Ecol. Evol.* **14**: 179–185.
- 546 Strauss, S.Y., Conner, J.K. & Rush, S.L. 1996. Foliar herbivory affects floral characters and  
547 plant attractiveness to pollinators: Implications for male and female plant fitness. *Am. Nat.*  
548 **147**: 1098–1107.
- 549 Strauss, S.Y., Rudgers, J.A., Lau, J.A. & Irwin, R.E. 2002. Direct and ecological costs of  
550 resistance to herbivory. *Trends Ecol. Evol.* **17**: 278–285.
- 551 Strauss, S.Y. & Whittall, J.B. 2006. Non-pollinator agents of selection on floral traits. In:  
552 *Ecology and Evolution of Flowers* (L.D. Harder & S.C.H. Barrett, eds), pp. 120–138.  
553 Oxford University Press, Oxford, UK.
- 554 Thaler, J.S. 1999. Jasmonate-inducible plant defences cause increased parasitism of herbivores.  
555 *Nature* **399**: 686–688.
- 556 Thaler, J.S., Stout, M.J., Karban, R. & Duffey, S.S. 1996. Exogenous jasmonates simulate insect

- 557 wounding in tomato plants (*Lycopersicon esculentum*) in the laboratory and field. *J. Chem.*  
558 *Ecol.* **22**: 1767–1781.
- 559 Thompson, K.A. & Johnson, M.T.J. 2016. Antiherbivore defenses alter natural selection on plant  
560 reproductive traits. *Evolution* **70**: 796–810.
- 561 Turcotte, M.M., Thomsen, C.J.M., Broadhead, G.T., Fine, P.V.A., Godfrey, R.M., Lamarre,  
562 G.P.A., *et al.* 2014. Percentage leaf herbivory across vascular plant species. *Ecology* **95**:  
563 788–788.
- 564 Underwood, N., Anderson, K. & Inouye, B.D. 2005. Induced vs. constitutive resistance and the  
565 spatial distribution of insect herbivores among plants. *Ecology* **86**: 594–602.
- 566 Underwood, N. & Rausher, M. 2002. Comparing the consequences of induced and constitutive  
567 plant resistance for herbivore population dynamics. *Am. Nat.* **160**: 20–30.
- 568 Uva, R., Neal, J. & DiTomaso, J. 1997. *Weeds of the Northeast*. Comstock Publishing  
569 Associates.
- 570 Van Zandt, P.A. & Agrawal, A.A. 2004. Specificity of induced plant responses to specialist  
571 herbivores of the common milkweed *Asclepias syriaca*. *Oikos* **104**: 401–409.
- 572 Willson, M.F. & Rathcke, B.J. 1974. Adaptive design of the floral display in *Asclepias syriaca*  
573 L. *Am. Midl. Nat.* **92**: 47–57.
- 574 Wyatt, R. & Broyles, S.B. 1994. Ecology and evolution of reproduction in milkweeds. *Annu.*  
575 *Rev. Ecol. Syst.* **25**: 423–441.
- 576 Zhen, Y., Aardema, M.L., Medina, E.M., Schumer, M. & Andolfatto, P. 2012. Parallel molecular  
577 evolution in an herbivore community. *Science* **337**: 1634–1637.
- 578
- 579

580 **Acknowledgements:** The authors are grateful to D. Anstett, D. Carmona, S. Heard, R. Rivkin, J.  
581 Santangelo, J. Stinchcombe, & A. Winn for comments that improved the manuscript. KAT was  
582 supported by an NSERC CGS-M award and a Queen Elizabeth II Scholarship in Science &  
583 Technology. KC was supported by an NSERC USRA. The project was supported by an NSERC  
584 Discovery Grant to MTJJ.

585

586 **Author contributions:** MTJJ and KAC conceived and designed the experiment. KAC collected  
587 the data. KAT and MTJJ analyzed the data. KAT wrote the first draft of the manuscript, and  
588 KAT and MTJJ revised the manuscript.

589 **Table**

590 **Table 1.** Multivariate phenotypic selection analysis depicting model-averaged coefficients ( $\beta$ ), z-  
591 values, and corresponding  $P$ -values from the ‘dredge’ multi-model selection procedure.  
592 Significant coefficients ( $P < 0.05$ ) and interaction terms are highlighted in bold. The model  
593 includes all plants that had data collected for all measured traits ( $n = 94$  plants). Significant main  
594 effects indicate that the treatment or trait directly affected fitness, and significant trait  $\times$  defense  
595 interaction terms indicate that selection on the trait is different between JA-induced and control  
596 plants. NA values indicate that a term was not sufficiently important to be included in any model  
597 within 2  $\Delta$ AIC of the best-fitting model.

598

|                                   | Female fitness** |              |                   | Male fitness*** |       |        |
|-----------------------------------|------------------|--------------|-------------------|-----------------|-------|--------|
|                                   | $\beta$          | $z$          | $P$               | $\beta$         | $z$   | $P$    |
| Induction*                        | <b>-0.513</b>    | <b>2.519</b> | <b>0.012</b>      | 0.068           | 0.589 | 0.556  |
| Damage*                           | -0.132           | 0.954        | 0.340             | 0.049           | 0.513 | 0.608  |
| Floral width PC*                  | -0.138           | 0.937        | 0.349             | -0.178          | 0.868 | 0.385  |
| Floral length PC                  | 0.001            | 0.036        | 0.971             | 0.103           | 0.797 | 0.425  |
| First flower *                    | -0.090           | 0.784        | 0.433             | -0.002          | 0.086 | 0.931  |
| Inflorescence number*             | -0.210           | 1.090        | 0.276             | 0.090           | 0.634 | 0.526  |
| Inflorescence size*               | <b>0.319</b>     | <b>1.985</b> | <b>0.047</b>      | 0.251           | 1.278 | 0.201  |
| Biomass*                          | <b>0.574</b>     | <b>3.638</b> | <b>&lt; 0.001</b> | 0.000           | 0.004 | 0.997  |
| Induction × Damage*               | 0.237            | 1.215        | 0.224             |                 | NA    |        |
| Floral length PC × Induction      |                  | NA           |                   | 0.121           | 0.761 | 0.447  |
| Floral width PC × Induction*      | 0.202            | 1.283        | 0.200             | 0.045           | 0.429 | 0.668  |
| First flower × Induction          | -0.003           | 0.096        | 0.923             |                 | NA    |        |
| Inflorescence number × Induction* | <b>0.856</b>     | <b>3.239</b> | <b>0.001</b>      | -0.039          | 0.320 | 0.749  |
| Inflorescence size × Induction*   | <b>-0.563</b>    | <b>2.849</b> | <b>0.004</b>      | -0.112          | 0.636 | 0.525  |
| Biomass × Induction*              | <b>-0.438</b>    | <b>2.137</b> | <b>0.033</b>      |                 | NA    |        |
| Floral length PC × Damage         |                  | NA           |                   | 0.002           | 0.058 | 0.954  |
| Floral width PC × Damage          | 0.019            | 0.257        | 0.797             | 0.358           | 1.766 | 0.0774 |
| First flower × Damage             | -0.006           | 0.129        | 0.898             |                 | NA    |        |
| Inflorescence number × Damage     | 0.044            | 0.372        | 0.710             |                 | NA    |        |
| Inflorescence size × Damage       | 0.010            | 0.183        | 0.855             | -0.026          | 0.298 | 0.766  |
| Biomass × Damage                  | 0.015            | 0.213        | 0.832             |                 | NA    |        |

599 \*term present in model with lowest AIC (i.e., best fitting model) in *dredge* analysis and used to  
600 generate residual values for direct selection analysis (female fitness only). \*\*Number of seeds  
601 produced. \*\*\*Mean pollinia removed per flower.

602 **Figure caption**

603 **Fig. 1.** Scatterplots comparing linear selection gradients between JA-induced ( $n = 40$ ) and  
604 control ( $n = 54$ ) plants in our experiment. **(A)** JA-induced plants experienced strong positive  
605 selection for more inflorescences, but selection was not acting on control plants. **(B)** Plants in  
606 both treatments experienced selection on inflorescence size, but selection was negative in JA-  
607 induced plants (JA+) and trended toward positive in control (JA-) plants. Selection gradient ( $\beta$ )  
608 values are reported adjacent to the corresponding selection gradient regression lines ( $\hat{P} = 0.056$ ;  
609  $*P < 0.05$ ;  $**P < 0.01$ ). Residual values from regressions with all traits are plotted to visualize  
610 the direct effect of the focal trait on fitness while controlling for the effects of other traits in the  
611 model.

612 **Figure**

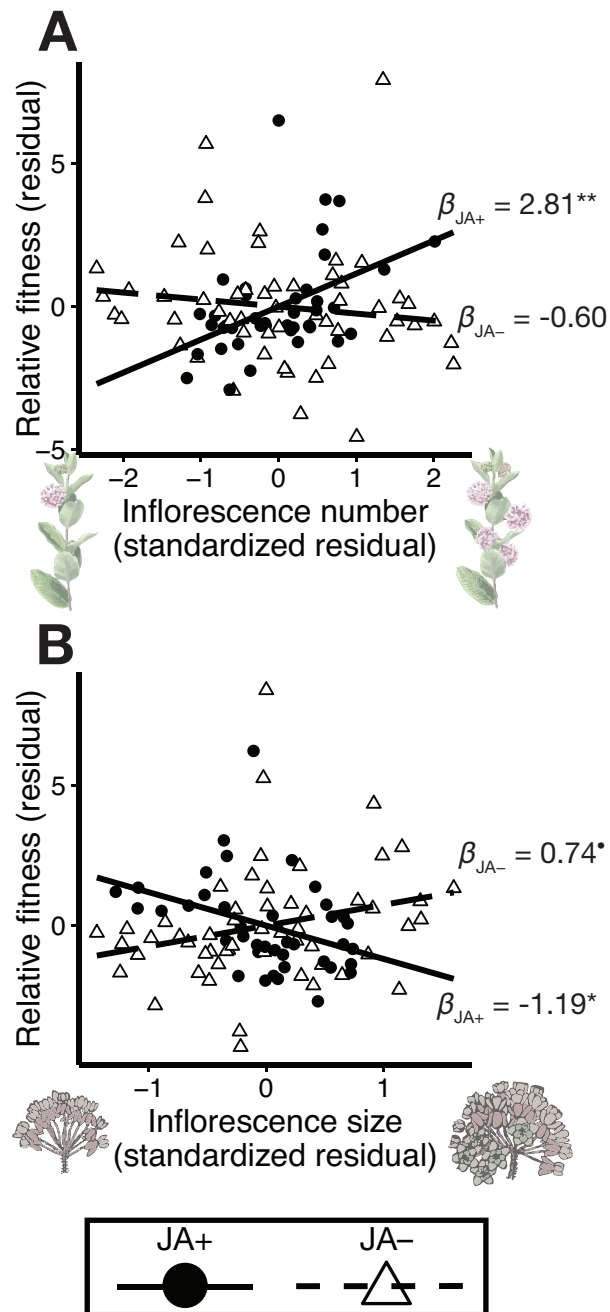

613

614 **Fig. 1.**

615 **Supplementary Materials for: “Induced defenses alter the strength and direction of natural**  
616 **selection on reproductive traits in common milkweed”**

617

618 This section contains:

619 S1.1. Supplementary tables

620 S1.2. Supplementary figures

621



622 **S1.1. Supplementary tables**

623 **Table S1.** Mean trait values and standard deviations, coefficients of phenotypic variation ( $CV_p$ ),  
 624 and data transformations for all traits and fitness components included in the multivariate  
 625 selection analysis.

| Trait                     | Mean   | SD     | $CV_p^*$               | Transformation |
|---------------------------|--------|--------|------------------------|----------------|
| <u>Fitness components</u> |        |        |                        |                |
| Seed count                | 149.97 | 307.45 | 205.00                 | None           |
| Pollinia removed**        | 0.56   | 0.55   | 98.82                  | None           |
| <u>Phenotypic traits</u>  |        |        |                        |                |
| Floral width PC           | 0.00   | 1.00   | $11.87 \pm 3.62^{***}$ | None           |
| Floral length PC          | 0.00   | 1.00   | $10.08 \pm 2.14^{***}$ | None           |
| Date of first flower****  | 32.61  | 5.06   | 15.54                  | $\ln(1 + x)$   |
| Inflorescence number      | 1.94   | 1.79   | 92.10                  | None           |
| Inflorescence size        | 47.38  | 22.65  | 47.82                  | None           |
| Biomass (g)               | 7.79   | 7.79   | 70.79                  | $\sqrt{x}$     |

626 \*We used untransformed data to calculate coefficients of phenotypic variation as  $CV_p =$

627  $100(V_p^{0.5} / \mu_i)$ , where  $\mu_i$  is the mean of trait  $i$ .

628 \*\*Mean per flower

629 \*\*\*Mean  $CV_p \pm 1$  SD of three most highly loading components (see Table S2).

630 \*\*\*\*Days from 1 Jun 2014.

631

632 **Table S2.** Summary of principal components analysis used to compress floral measurements into  
633 two principal components. The three variables with highest loading values on each component  
634 are highlighted in bold.

|                                   | Floral width (PC1) | Floral length (PC2) |
|-----------------------------------|--------------------|---------------------|
| <u>Factor loadings</u>            |                    |                     |
| Petal length                      | 0.16               | <b>0.93</b>         |
| Petal width                       | <b>0.79</b>        | 0.15                |
| Sepal length                      | 0.60               | <b>0.70</b>         |
| Sepal width                       | <b>0.85</b>        | 0.30                |
| Flower length                     | 0.39               | <b>0.90</b>         |
| Flower width                      | <b>0.76</b>        | 0.46                |
| Eigenvalue                        | 4.10               | 0.83                |
| Proportion variance explained (%) | 68                 | 14                  |

635 **Table S3.** Phenotypic correlation matrix for all measured traits\*. *P*-values are below the  
 636 diagonal and Pearson's product-moment correlation *r*-values are above the diagonal. Significant  
 637 correlations ( $P < 0.05$ ) are in **bold**.

|           | Infl num       | Infl size      | Hd lgt         | Hd wdt         | Ptl lgt        | Ptl wdt        | Flwr lgt       | Flwr wdt     | Frst flwr    | Biomass     |
|-----------|----------------|----------------|----------------|----------------|----------------|----------------|----------------|--------------|--------------|-------------|
| Infl num  | —              | <b>0.68</b>    | <b>0.29</b>    | 0.12           | <b>0.25</b>    | 0.17           | <b>0.32</b>    | <b>0.3</b>   | <b>-0.31</b> | <b>0.78</b> |
| Infl size | < <b>0.001</b> | —              | <b>0.27</b>    | 0.18           | <b>0.28</b>    | 0.19           | <b>0.33</b>    | <b>0.32</b>  | -0.01        | <b>0.5</b>  |
| Hd lgt    | <b>0.004</b>   | <b>0.008</b>   | —              | <b>0.38</b>    | <b>0.63</b>    | <b>0.43</b>    | <b>0.86</b>    | <b>0.49</b>  | -0.13        | <b>0.46</b> |
| Hd wdt    | 0.256          | 0.091          | < <b>0.001</b> | —              | <b>0.46</b>    | <b>0.57</b>    | <b>0.48</b>    | <b>0.51</b>  | -0.03        | <b>0.21</b> |
| Ptl lgt   | <b>0.016</b>   | <b>0.006</b>   | < <b>0.001</b> | < <b>0.001</b> | —              | <b>0.72</b>    | <b>0.86</b>    | <b>0.8</b>   | -0.06        | <b>0.33</b> |
| Ptl wdt   | 0.104          | 0.072          | < <b>0.001</b> | < <b>0.001</b> | < <b>0.001</b> | —              | <b>0.58</b>    | <b>0.75</b>  | -0.04        | <b>0.31</b> |
| Flwr lgt  | <b>0.002</b>   | <b>0.001</b>   | < <b>0.001</b> | < <b>0.001</b> | < <b>0.001</b> | < <b>0.001</b> | —              | <b>0.67</b>  | -0.08        | <b>0.41</b> |
| Flwr wdt  | <b>0.003</b>   | <b>0.001</b>   | < <b>0.001</b> | < <b>0.001</b> | < <b>0.001</b> | < <b>0.001</b> | < <b>0.001</b> | —            | -0.11        | <b>0.35</b> |
| Frst flwr | <b>0.002</b>   | 0.920          | 0.226          | 0.740          | 0.574          | 0.683          | 0.432          | 0.305        | —            | -0.11       |
| Biomass   | < <b>0.001</b> | < <b>0.001</b> | < <b>0.001</b> | <b>0.046</b>   | <b>0.001</b>   | <b>0.002</b>   | < <b>0.001</b> | <b>0.001</b> | 0.285        | —           |

638 \**Infl num*: Inflorescence number; *Infl size*: Inflorescence size; *Hd lgt*: Hood length; *Hd wdt*:  
 639 Hood width; *Ptl lgt*: Petal length; *Ptl wdt*: Petal width; *Flwr lgt*: Flower length, *Flwr wdt*: Flower  
 640 width; *Frst flwr*: First flower

641 **Table S4.** Phenotypic correlation matrix for all traits\* after collapsing the six floral traits into  
 642 two principal components *P*-values are below the diagonal and Pearson's *r* values are above the  
 643 diagonal. Significant correlations ( $P < 0.05$ ) are in **bold**.

|           | Infl Num     | Infl Size    | Frst Flwr**  | Flrl Wdt** | Flrl Lgth   | Biomass     |
|-----------|--------------|--------------|--------------|------------|-------------|-------------|
| Infl Num  | —            | <b>0.68</b>  | <b>-0.31</b> | 0.12       | <b>0.3</b>  | <b>0.78</b> |
| Infl Size | <b>0</b>     | —            | -0.01        | 0.17       | <b>0.28</b> | <b>0.5</b>  |
| Frst Flwr | <b>0.002</b> | 0.920        | —            | -0.03      | -0.1        | -0.11       |
| Flrl Wdt  | 0.249        | 0.096        | 0.809        | —          | 0           | 0.19        |
| Flrl Lgth | <b>0.003</b> | <b>0.006</b> | 0.318        | 1          | —           | <b>0.4</b>  |
| Biomass   | <b>0</b>     | <b>0</b>     | 0.285        | 0.069      | <b>0</b>    | —           |

644 \**Infl num*: Inflorescence number; *Infl size*: Inflorescence size; *Flrl lgt*: Floral length PC; *Flrl wdt*

645 PC: Floral width; *Frst flwr*: First flower

646 \*\*Principal components analysis scores

647 **Table S5.** Mean values ( $\mu$ ) and standard deviations for JA-induced (JA+) and control (JA-) plants. No trait values differed between JA-induced in control plants, or across damage treatments, in univariate ANOVA with type-III SS. Mean values are not shown for the damage treatment.

| Trait                     | <i>df</i> | Induction     |              |               |              | Damage   |          |          |          |
|---------------------------|-----------|---------------|--------------|---------------|--------------|----------|----------|----------|----------|
|                           |           | $\mu_{(JA+)}$ | $SD_{(JA+)}$ | $\mu_{(JA-)}$ | $SD_{(JA-)}$ | <i>F</i> | <i>P</i> | <i>F</i> | <i>P</i> |
| <u>Fitness components</u> |           |               |              |               |              |          |          |          |          |
| Seed count                | 1, 147    | 132.92        | 282.07       | 165.50        | 329.92       | 0.42     | 0.52     | 0.25     | 0.62     |
| Pollinia removed          | 1, 147    | 0.53          | 0.60         | 0.58          | 0.50         | 0.36     | 0.55     | 0.52     | 0.47     |
| <u>Phenotypic traits</u>  |           |               |              |               |              |          |          |          |          |
| Floral width (PC1)        | 1, 92     | -0.03         | 1.05         | 0.02          | 0.97         | 0.05     | 0.82     | 0.24     | 0.62     |
| Floral length (PC2)       | 1, 92     | -0.04         | 1.00         | 0.03          | 1.01         | 0.10     | 0.75     | 0.42     | 0.52     |
| Date of first flower***   | 1, 92     | 32.33         | 4.51         | 32.83         | 5.48         | 0.17     | 0.68     | 0.26     | 0.61     |
| Inflorescence number      | 1, 147    | 1.82          | 1.87         | 2.06          | 1.72         | 0.71     | 0.40     | 2.12     | 0.15     |
| Inflorescence size        | 1, 93     | 52.20         | 24.87        | 43.72         | 20.30        | 3.34     | 0.07     | 0.66     | 0.42     |
| Biomass (g)               | 1, 147    | 7.38          | 6.36         | 8.16          | 4.61         | 2.67     | 0.10     | 2.18     | 0.14     |

651

652 **S1.2. Supplementary figures**

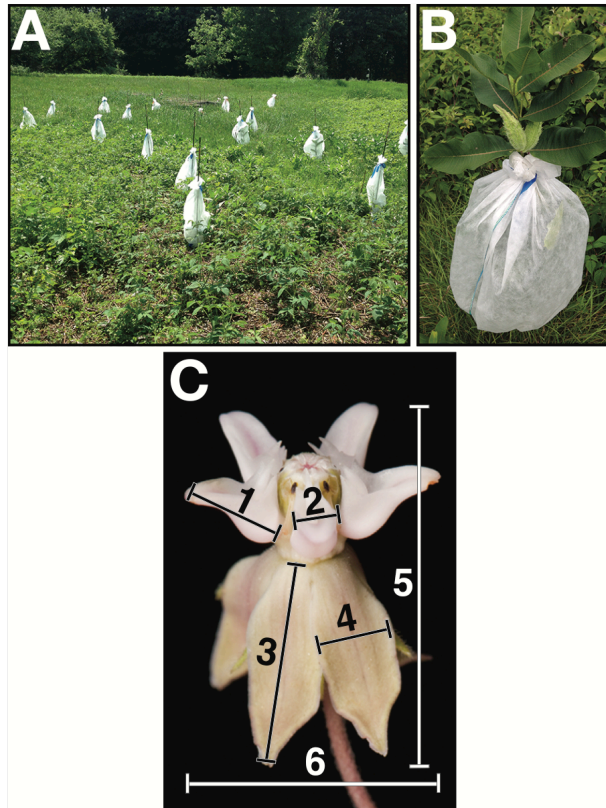

653

654 **Fig. S1.** Photographs of the experiment and floral details of the common milkweed, *Asclepias*  
655 *syriaca*, study system. (A) Array of bagged milkweed plants at the beginning of the experiment.

656 (B) Individual bagged milkweed plant with ripening fruit. (C) Photograph (credit: Ellen Woods)

657 of an *A. syriaca* flower with flower measurements indicated (1: hood length, 2: hood width, 3:

658 petal length, 4: petal width, 5: flower length, 6: flower width).

659

660

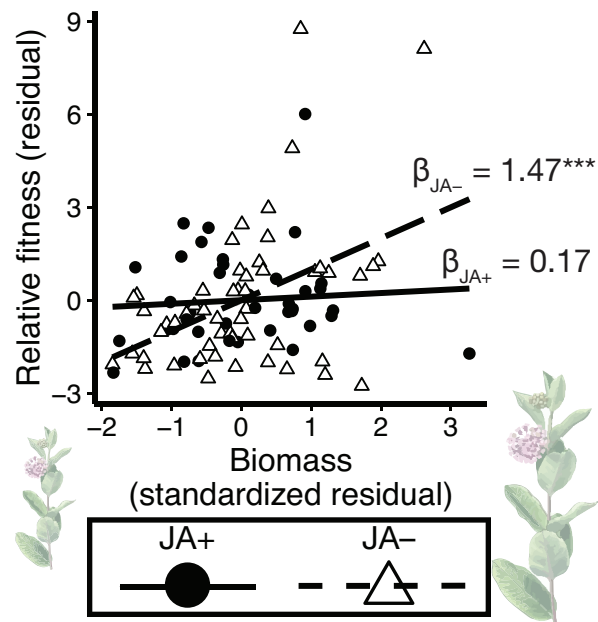

661

662 **Fig. S2.** Scatterplot comparing linear selection gradients for biomass between JA-induced ( $n =$   
663 40) and control ( $n = 54$ ) plants in the experiment. Specifically, control plants (JA-) experienced  
664 positive selection on biomass, while selection was not acting on JA-induced plants (JA+). The  
665 selection gradient values ( $\beta$ ) are given adjacent to the corresponding selection gradients ( $***P <$   
666 0.001).

667 **Image attribution**

668 *Asclepias* inflorescences used in Fig. 1A were modified from:

669 USDA-NRCS PLANTS Database / Britton, N.L., and A. Brown. 1913. An illustrated  
670 flora of the northern United States, Canada and the British Possessions. 3 vols.  
671 Charles Scribner's Sons, New York. Vol. 3: 29.

672 Drawings of full *A. syriaca* plants used in Fig. 1B and Fig. S2 were modified from a drawing by  
673 Zsoldos Márton, licensed under the Creative Commons Attribution-Share Alike 3.0 Unported  
674 license.

675
